# Supplementary material for: Norcaradiene intermediates in mass spectral fragmentations of tropone and tropothioneElectronic supplementary information (ESI) available: reaction paths supporting Figs. 3â€“6. See http://www.rsc.org/suppdata/p2/b1/b102127n/
Source: Royal Society of Chemistry journal article supplement (doi:10.1039/b102127n), 2001-10-12
Supplement: b102127n.doc [file b102127n.doc]

Supplementary Data

(1) Reaction path of benzene cation radical formation from tropone supporting Figure 3.

Distances are in Angstrom. For two TSs, reaction-coordinate vectors corresponding to sole imaginary frequencies, **‡s, are sketched. For **1**+•, an in-plane vibrational mode (**12 = 854.1 cm–1) of the irreducible representation A1 is shown.

(2) Dehydrogenation path of tropone supporting Figure 4.

(3) Reaction path of benzene cation radical formation from tropothione supporting Figure 5.

(4) Dehydrogenation path of tropothione supporting Figure 6.
